# Supplementary material for: Change of water consumption and its potential influential factors in Shanghai: A cross-sectional study
Source: PubMed Central journal article supplement (PMC3539858; doi:10.1186/1471-2458-12-450), 2012-06-18
Supplement: 1471-2458-12-450-S2.pdf [file 1471-2458-12-450-S2.pdf]

Please select **one best answer** for each question. Two more choices is regarded proper only for questions we specially marked out.

# Questionnaire for Water Consumption Habits

## I. Individual Information

1. **Gender:** (1) Male (2) Female
2. **Place of birth:** \_\_\_\_\_
3. **Date of birth:** \_\_\_\_\_
4. **Home address:** \_\_\_\_\_Room \_\_\_\_\_Building \_\_\_\_\_Road \_\_\_\_\_Lane
5. **How long have you lived in this place?** \_\_\_\_\_years
6. **Education:** (1) Junior middle school or below (2) High school (3) Technical school  
(4) Junior college (5) College/university (6) Above university
7. **Current occupation:** \_\_\_\_\_  
7.1. **Previous occupation:** \_\_\_\_\_
8. **Your annual income in 2010:** (1) \$ 0-2,308 (2) - \$4,615 (3) - \$7,692 (4) > \$7,692
9. **Do you expose to water in your current/previous occupation?**

If not, please go to II. Habits of Drinking Water.

- 9.1. **Season of exposure:** (1) Spring (2) Summer (3) Autumn (4) Winter  
(you can choose more than one option)
- 9.2. **Frequency of exposure:** (1) 1-2 times per month (2) 1-2 times per week  
(3) 3-4 times per week (4)  $\geq 5$  times per week
- 9.3. **Time length of exposure:** (1) 0-1 hour (2) - 2 hours (3) - 4 hours (4) - 6 hours (5) > 6 hours
- 9.4. **Type of water:** (1) Tap water (2) Boiled tap water (3) Others \_\_\_\_\_
- 9.5. **Protection measure:** (1) No protection (2) Gloves only (3) Mask only  
(4) Gloves and mask (5) Others \_\_\_\_\_

## II. Habits of Drinking Water

1. **What kind of water do you usually take at home?**  
(1) Tap water (2) Barreled water (3) Bottled water (4) Filtrated water
2. **What kind of water do you usually take at work?**  
(1) Tap water (2) Barreled water (3) Bottled water (4) Filtrated water
3. **In spring/autumn, how much water do you drink on average?**  
\_\_\_\_\_ cup (\_\_\_\_\_ml/cup)
4. **In summer, how much water do you drink on average?**  
\_\_\_\_\_ cup (\_\_\_\_\_ml/cup)
5. **In winter, how much water do you drink on average?**

\_\_\_\_\_ cup (\_\_\_\_\_ml/cup)

**6. Do you ever process your drinking water using following methods?**

- (1) Heated by microwave oven (2) Frozen by fridge (3) Neither (4) Both

**7. What kind of water do you usually use for tea, coffee or soybean?**

- (1) Boiled tap water (2) Boiled barreled water (3) Both (4) Others \_\_\_\_\_

**8. Do you drink overnight water?**

- (1) Never (2) 1-2 times per month (3) 1-2 times per fortnight (4)  $\geq 3$  times per week

**9. Do you drink tap water directly?** (1) Never (2) Occasionally (3) Often ( $\geq$  once a week)

**10. What is your kettle made of?** (1) Aluminum (2) Stainless steel (3) Plastic (4) Others

**11. How long will you continue to heat your kettle after the water is boiled?**

- (1)  $\leq 1$  min (2) -5 min (3) -10 min (4)  $> 10$  min

**12. Do you drink tea?**

If not, please go to Q 13.

12.1 **Which kind of tea do you usually drink?** (1) Green tea (2) Black tea

(3) Oolong tea (4) Others \_\_\_\_\_

12.2 **How much do you drink daily?** \_\_\_\_\_ cup (\_\_\_\_\_ml/cup)

12.3 **Do you drink overnight tea?** (1) Never (2) 1-2 times per month

(3) 1-2 times per week (4)  $\geq 3$  times per week

**13. Do you drink soybean, milk or juice?**

- (1) Never (2) 1-2 times per week (3) 3-5 times per week (3) 6-7 times per week (4) More than once per day

**14. Do you drink beverage brewed by milk powder, wheat or etc.?**

If not, please go to Q 15.

14. 1 **Frequency:** (1) 1-2 times per week (2) 3-5 times per week (3) 6-7 times per week

(4) More than once per day

14.2 **Volume for each time:** \_\_\_\_\_ml

**15. Do you drink coffee?**

If not, please go to Q 16.

15.1. **Drink frequency:** (1) 1-2 times per month (2) 1-2 times per week

(3) 3-5 times per week (4)  $> 5$  times per week

15.2. **Drink volume for each time:** \_\_\_\_\_ml

**16. Do you prefer hot or cold drink?**

- (1) Hot drink (2) Cold drink (3) Hot for winter, others cold (4) Cold for summer, others hot (5) Don't mind

**17. What is your drinking-water bottle made of?** (1) Plastic (2) Non plastic

**18. How often do you clean your drinking water container?**

- (1) Once every day (2) 2-3 times a week (3) Once a week (4) More than once a week

### III. Bathing Habits

1. **Your usual way of washing yourself is:** (1) Shower (2) Bath (3) Rubbing with towel
2. **In spring/autumn, your frequency of shower is:** (1) Once every day (2) Once every 2 days (3) Once every 3-4 days (4) Once every 5-7 days (5) Longer
  - 2.1 **Time length of each shower:** (1) In 10 min (2) -20 min (3) -30 min (4) -45 min (5) -60 min (6) > 60 min
3. **In summer, your frequency of shower is:** (1) More than once every day (2) Once every day (3) Once every 2 days (4) Once every 3 days (5) Longer
  - 3.1 **Time length of each shower:** (1) In 10 min (2) -20 min (3) -30 min (4) -45 min (5) -60 min (6) > 60 min
4. **In winter, your frequency of shower:** (1) Once every day (2) Once every 2 days (3) Once every 3-4 days (4) Once every 5-7 days (5) Longer
  - 4.1 **Time length of each shower:** (1) In 10 min (2) -20 min (3) -30 min (4) -45 min (5) -60 min (6) > 60 min
5. **Do you bath in bathtub?**

If not, please go to Q6.

  - 5.1 **Season to bath:** (1) Spring (2) Summer (3) Autumn (4) Winter [You may choose one more choice]
  - 5.2 **Frequency of bath:** (1) Daily (2) Once every 2-4 days (3) Once every 5-7 days (4) Longer
  - 5.3 **Time length of each bath:** (1) In 15 min (2) -30 min (3) -45 min (4) -60 min (5) > 60 min
6. **Do you bath with cold water?**

If not, please go to Q7.

  - 6.1 **Season to bath with cold water:** (1) Spring (2) Summer (3) Autumn (4) Winter [You may choose one more choice]
7. **Did you ever bath at public bathing place in 2010?**

If not, please go to Q8.

  - 7.1 **Frequency of bath:** (1) <10 times (2) 10-50 times (3) >50 times
  - 7.2 **Time length of each bath:** (1) In 15 min (2) -30 min (3) -60 min (4) > 60 min
8. **Do you sauna?**

If not, please go to Q9.

  - 8.1 **Sauna type:** (1) Dry sauna (2) Steamed sauna (3) Both
  - 8.2 **When to sauna:** (1) Spring (2) Summer (3) Autumn (4) Winter [You may choose one more choice]
  - 8.3 **Frequency:** (1) Once every day (2) Once every 2-4 days (3) Once every 5-7 days (4) Once every 2 weeks (5) Once every month
  - 8.4 **Time length of each sauna:** (1) In 5 min (2) -10 min (3) -20 min (4) -30 min (5) > 30 min
9. **Frequency of rubbing yourself with towel:** (1) Never (2) Rubdown whenever fail to shower/bath (3) Others \_\_\_\_\_
  - 9.1 **Water temperature:** (1) Hot water (2) Cold water (3) Hot for winter, others cold

(4) Cold for summer, others hot

**10. Do you take foot bath?** (1) Never (2) Yes, for 4 seasons (3) Yes, only for winter

**11. You wash face with:** (1) Cold water (2) Hot water (3) Hot for winter, others cold

(4) Cold for summer, others hot

## IV. Other Habits

### 1. Do you wash dishes at home?

If not, please go to Q2.

**1.1 Frequency of washing:** (1) Once every day (2) Once every 2 days

(3) Once every 3-5 days (4) Once every 6-7 days

**1.2 Time length of each wash:** (1) In 10 min (2) -30 min (3) >30 min

**1.3 Protection measure** (1) With gloves every time (2) Gloves only for winter (3) Never

### 2. Do you wash clothes by hands at home?

If not, please go to Q3.

|                                  | <b>In spring/autumn</b> | <b>In summer</b>       | <b>In winter</b>       |
|----------------------------------|-------------------------|------------------------|------------------------|
| <b>Frequency of washing:</b>     | (1) Daily               | (1) Daily              | (1) Daily              |
|                                  | (2) 2-5 times per week  | (2) 2-5 times per week | (2) 2-5 times per week |
|                                  | (3) 6-7 times per week  | (3) 6-7 times per week | (3) 6-7 times per week |
|                                  | (4) Never               | (4) Never              | (4) Never              |
| <b>Time length of each wash:</b> | (1) In 10 min           | (1) In 10 min          | (1) In 10 min          |
|                                  | (2) -30 min             | (2) -30 min            | (2) -30 min            |
|                                  | (3) -60 min             | (3) -60 min            | (3) -60 min            |
|                                  | (4) > 60 min            | (4) > 60 min           | (4) > 60 min           |

**2. 1 Protection measure:** (1) With gloves every time (2) Gloves only for winter (3) Never

### 3. Do you wash clothes by washing machine at home?

If not, please go to Q4.

**3. 1 How many times do you wash clothes for more than 1 hour every month?** \_\_\_\_\_ times

### 4. Do you iron your clothes?

If not, please go to Q5.

**4.1 Frequency of iron:** (1) Daily (2) Once every week (3) Once every 2 weeks

(4) Once every month (5) Others \_\_\_\_\_

**4.2 Time length of each ironing:** (1) In 10 min (2) -30 min (3) -60 min (4) -120 min

**4.3 Temperature of iron:** (1) Low temp (2) High temp (3) Both

**5. Do you steam-bathing your face?**

If not, please go to Q6.

5.1 **Frequency of steam:** (1) Daily (2) Once every 2-4 days (3) Once every 5-7 days

(4) Once every 2 weeks (5) Once every month

5.2 **Time length of each steam-bathing:** (1) In 10 min (2) 10-30 min (3) 30-60 min (4) > 60 min

5.3 **How long have you kept this habit?** \_\_\_\_\_years

**6. Do you swim?**

If not, please go to Q7.

6.1 **How many months do you swim in a year (at least twice a month)?** \_\_\_\_\_months

6.2 **How many times do you swim in these months?** (1) < 5 times (2) 5-10 times

(3) 11-15 times (4) 16-20 times (5) ≥ 20 times

6.3 **Where do you swim?** (1) Indoor swimming pool (2) Outdoor swimming pool

(3) River (4) Sea water

6.4 **Time length of each swimming:** (1) In 30 min (2) -60 min (3) - 90 min (4) -120 min

(5) > 120 min

6.5 **How long have you kept this habit?** \_\_\_\_\_years

**7. How long do you sit every day?** (1) ≤ 8 hours (2) -10 hours (3) -12 hours (4) > 12 hours

**8. Do you smoke now?** (1) No (2) Occasionally (3) Often (4) Everyday

**9. Do you drink alcohol?** (1) Never (2) Occasionally (3) Often (4) Everyday

**V. Health Status**

**1. Weight:** \_\_\_\_\_ (kg) **Height:** \_\_\_\_\_ (cm)

**2. Do you have diabetes?** (1) No/don't know (2) ≤ 5 years (3) ≤ 10 years (4) More than 10 years

**3. Do you have constipation?** (1) Never (2) Occasionally (3) Often

**4. Do you have enteritis?** (1) Never (2) Acute enteritis

(3) Chronic enteritis (duration > 2 months) (4) Not sure

**5. Did you suffer from drinking-water related diarrhea in 2010?**

(1) None (2) < 5 times (3) 5- 10 times (4) > 10 times

**6. How many times were you diagnosed of drinking-water related diarrhea by doctor in 2010?**

\_\_\_\_\_times

**7. Do you think above-mentioned diarrhea was associated with drinking water habits?**

(1) Yes, they greatly associated. (2) Yes, but have small association. (3) I don't think so.

## VI. Drinking Habits for Your Family

### 1. Does your family drink barreled water ?

If not, please go to Q2.

#### 1.1 How often do you disinfect your barrellled water machine?

- (1) Once a month (2) Once a trimester (3) Once half year (4) Once a year  
(5) More than one year (6) Never

#### 1.2 How do you disinfect your barreled water machine? (you may choose more than one option)

- (1) Water (2) Vinegar (3) Ethanol (4) Chemical reagent (5) Professional disinfection

### 2. Does your family drink filtrated water?

If not, please go to Q3.

#### 2.1 How often do you replace your filter?

- (1) Once a month (2) Once a trimester (3) Once half year  
(4) Once a year (5) More than one year (6) Never

#### 2.1 What's your filter made of? \_\_\_\_\_

### 3. What does your family usually do with tap water/boiled tap water?

- (1) Drinking (2) Brushing teeth (3) Washing face and body (4) Cooking  
(5) Washing vegetables (6) Washing fruits

### 4. Does your family use vacuum bottle to store boiled water?

If not, please go to Q5.

#### 4.1 How often do you clean the bottle?

- (1) More than once a week (2) Once a week (3) Once every fortnight (4) Once a month (5) Longer

### 5. Quality of your domestic tap water

#### 5.1 Turbidity

- (1) Transparent (2) Slightly turbid (3) Moderately turbid (4) Severely turbid

#### 5.2 Color

- (1) Colorless (2) Others \_\_\_\_\_

#### 5.3 Taste

- (1) Good (2) Just so so (3) Uncomfortable/Bad

#### 5.4 Smell

- (1) Normal (2) Abnormal \_\_\_\_\_

### 6. Did you ever find bloodworm in the water in 2010?

- (1) Never (2) 1-5 times (3) 6-10 times (4) > 10 times

### 7. How does your family treat retained water? (Retained water is tap water stayed in the pipe for more than 6 hours.)

- (1) Boiled for drinking (2) Brushing teeth (3) Washing face and body  
(4) Cooking (5) Cleaning (6) Discarded

**8. Do you have child? (If having one more child, just provide the following information for the first child)**

If not, please go to VII. Subjective Questions.

8.1 **Was your child born in Shanghai?** (1) Yes (2) No

8.2 **How old is he/she?** \_\_\_\_\_

8.3 **Was he/she breast-fed?** (1) Yes, for \_\_\_\_\_ months (2) No

8.4 **Was he/she fed with milk substituents during lactation period?**

(1) No (2) Yes

↓ a. **Type of substituents:** (1) milk powder (2) milk (3) others \_\_\_\_\_

↓ b. **Daily drink volume :** \_\_\_\_\_ **For how long:** \_\_\_\_\_ months

8.5 **Did he/she have baby-swimming before 3 years old?**

(1) No (2) Yes

↓ a. **Frequency of swimming:** (1) 1-3 times (2) 4-10 times (3) > 10 times

↓ b. **Time length of each swimming:** (1) 15-20 min (2) > 20 min

8.6 **Did he/she have drinking water related diarrhea before 3 years old?**

(1) Never (2) Seldom (3) Occasionally (4) Often (5) Not for sure

**VII. Subjective Questions**

**1. What kind of water do you think is the cleanest/safest for drinking?**

(1) Boiled water (2) Bottled Water (3) Barrelled Water (4) Filtrated Water (5) Don't mind

**2. Do you know the reason why we need to chlorinate our water?**

(1) To kill bacteria (2) To remove organic pollutants (3) I don't know

**3. Have you ever heard of disinfection by-products?**

(1) No, I've never heard of (2) Yes, it is good for my health (3) Yes, it is bad for my health

**4. Please list ways of disinfection in water treatment process you know:**

---
